# Supplementary material
Source: publisher figshare collection journal article supplement (https://acs.figshare.com/ndownloader/files/17620154)
Supplement: Supplementary file 1 [file 17620154]

## Supporting Information

# Interfacial Mass Transfer in Water - Toluene Systems

Roland Nagl<sup>1</sup>, Patrick Zimmermann<sup>1</sup>, Tim Zeiner<sup>1,\*</sup>

<sup>1</sup> Institute of Chemical Engineering and Environmental Technology, Graz University of Technology, Inffeldgasse 25/C, 8010

Graz, Austria.

\* Corresponding author. Tim Zeiner: [tim.zeiner@tugraz.at](mailto:tim.zeiner@tugraz.at)

**Table S1.** Starting compositions for mass transfer experiments where the transferring component was added to either the aqueous or both phases at  $T = 298.15$  K and  $p = 0.1$  MPa<sup>a</sup>

| Transferring component $i$ | Injection phase | water-rich phase |               |       | toluene-rich phase |               |       |
|----------------------------|-----------------|------------------|---------------|-------|--------------------|---------------|-------|
|                            |                 | $W_{water}$      | $W_{toluene}$ | $W_i$ | $W_{water}$        | $W_{toluene}$ | $W_i$ |
| acetone                    | aqueous         | 0.886            | 0.0008        | 0.112 | 0.000              | 0.9996        | 0.000 |
|                            | s               | 8                |               | 4     | 4                  |               | 0     |
| acetone                    | both            | 0.942            | 0.0005        | 0.057 | 0.000              | 0.9316        | 0.068 |
|                            |                 | 4                |               | 1     | 3                  |               | 1     |
| ethanol                    | aqueous         | 0.884            | 0.0006        | 0.115 | 0.000              | 0.9996        | 0.000 |
|                            | s               | 0                |               | 4     | 4                  |               | 0     |
| ethanol                    | both            | 0.940            | 0.0007        | 0.059 | 0.000              | 0.9323        | 0.067 |
|                            |                 | 3                |               | 0     | 4                  |               | 3     |
| tetrahydrofuran            | aqueous         | 0.885            | 0.0006        | 0.114 | 0.000              | 0.9994        | 0.000 |
|                            | s               | 4                |               | 0     | 6                  |               | 0     |
| tetrahydrofuran            | both            | 0.940            | 0.0005        | 0.059 | 0.000              | 0.9317        | 0.067 |
|                            |                 | 0                |               | 5     | 6                  |               | 7     |
| acetonitrile               | aqueous         | 0.887            | 0.0004        | 0.112 | 0.000              | 0.9995        | 0.000 |
|                            | s               | 3                |               | 3     | 5                  |               | 0     |
| acetonitrile               | both            | 0.940            | 0.0005        | 0.059 | 0.000              | 0.9330        | 0.066 |
|                            |                 | 3                |               | 2     | 3                  |               | 7     |

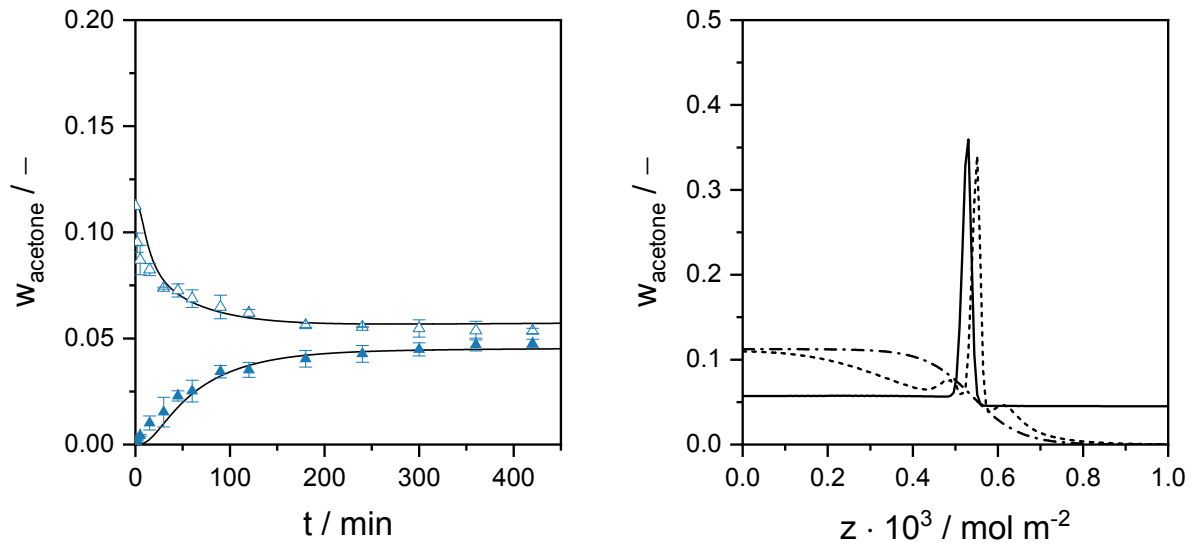

Figure S1. Interfacial mass transfer of acetone in the system water + toluene + acetone at  $T = 298.15$  K. Acetone was injected in the aqueous phase at  $t = 0$  min. Left: Development of the bulk phase composition over time:  $\blacktriangle$ , weight fraction of acetone in toluene-rich phase;  $\triangle$ , weight fraction of acetone in water-rich phase; lines are calculated by stationary DGT. Right: Concentration profile across the interface calculated by stationary DGT: dash-dotted line,  $t = 0$  min; dotted line,  $t = 5$  min; straight line,  $t = 450$  min.

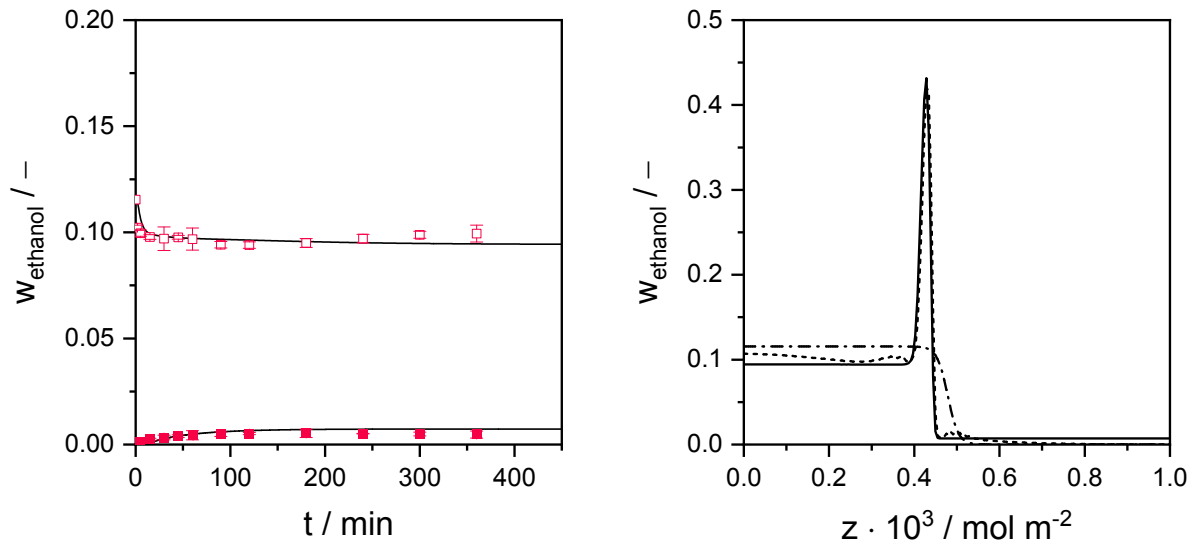

Figure S2. Interfacial mass transfer of ethanol in the system water + toluene + ethanol

$T = 298.15$  K. Left: Ethanol was injected in the aqueous phase at  $t = 0$  min.

Development of the bulk phase composition over time:  $\blacksquare$ , weight fraction of ethanol in toluene-rich phase;  $\square$ , weight fraction of ethanol in water-rich phase; lines are calculated by stationary DGT. Right: Concentration profile across the interface calculated by stationary DGT: dash-dotted line,  $t = 0$  min; dotted line,  $t = 5$  min; straight line,  $t = 450$  min.

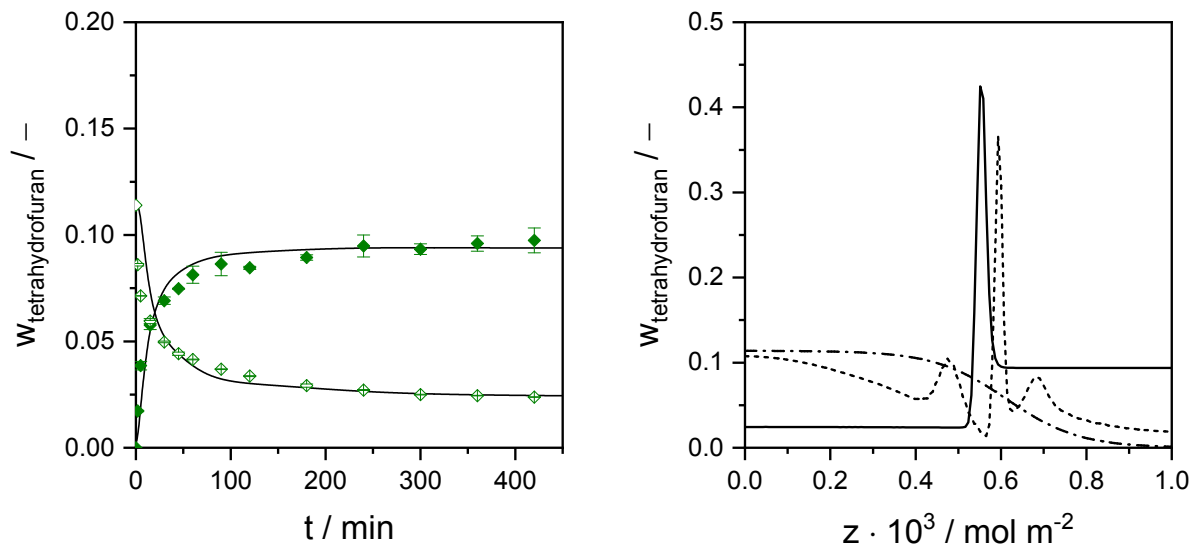

Figure S3. Interfacial mass transfer of tetrahydrofuran in the system water + toluene + tetrahydrofuran  $T = 298.15$  K. Tetrahydrofuran was injected in the aqueous phase at  $t = 0$  min. Left: Development of the bulk phase composition over time:  $\blacklozenge$ , weight fraction of tetrahydrofuran in toluene-rich phase;  $\diamond$ , weight fraction of tetrahydrofuran in water-rich phase; lines are calculated by stationary DGT. Right: Concentration profile across the interface calculated by stationary DGT: dash-dotted line,  $t = 0$  min; dotted line,  $t = 5$  min; straight line,  $t = 450$  min.

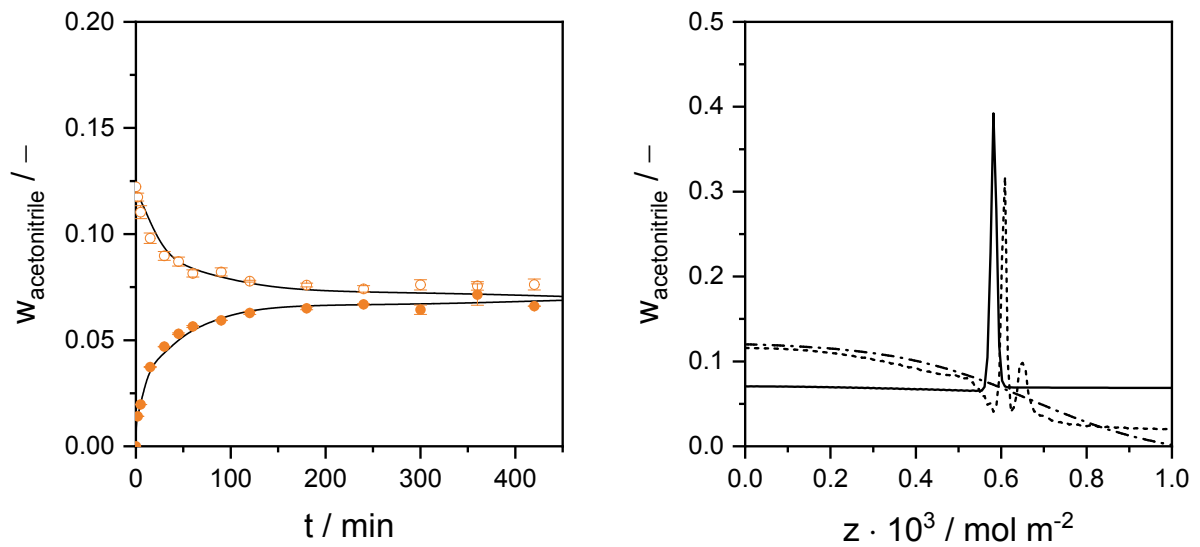

Figure S4. Interfacial mass transfer of acetonitrile in the system water + toluene + acetonitrile  $T = 298.15$  K. Acetonitrile was injected in the aqueous phase at  $t = 0$  min.

Left: Development of the bulk phase composition over time: ●, weight fraction of acetonitrile in toluene-rich phase; ○, weight fraction of acetonitrile in water-rich phase; lines are calculated by stationary DGT. Right: Concentration profile across the interface calculated by stationary DGT: dash-dotted line,  $t = 0$  min; dotted line,  $t = 5$  min; straight line,  $t = 450$  min.

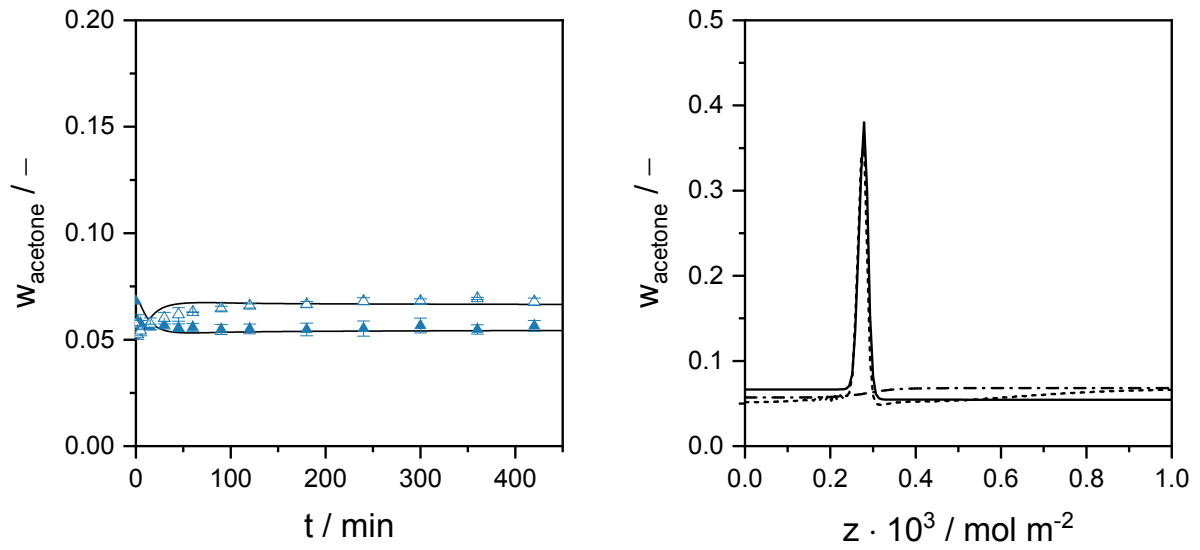

Figure S5. Interfacial mass transfer of acetone in the system water + toluene + acetone at  $T = 298.15$  K. Acetone was injected into both phases at  $t = 0$  min. Left: Development of the bulk phase composition over time:  $\blacktriangle$ , weight fraction of acetone in toluene-rich phase;  $\triangle$ , weight fraction of acetone in water-rich phase; lines are calculated by instationary DGT. Right: Concentration profile across the interface calculated by instationary DGT: dash-dotted line,  $t = 0$  min; dotted line,  $t = 5$  min; straight line,  $t = 450$  min.

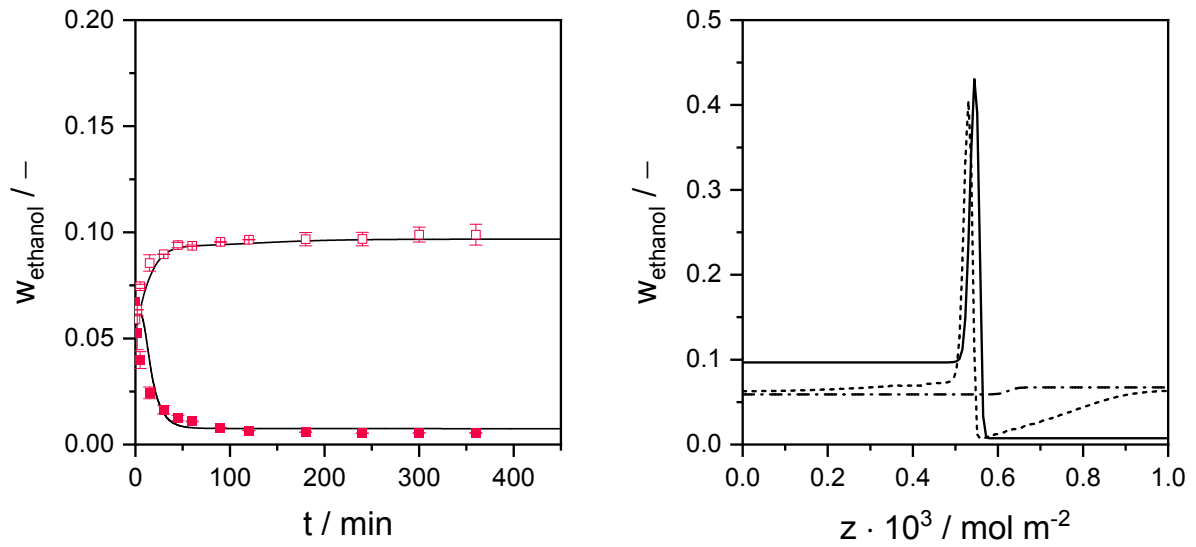

Figure S6. Interfacial mass transfer of ethanol in the system water + toluene + ethanol  $T = 298.15$  K. Ethanol was injected into both phases at  $t = 0$  min. Left: Development of the bulk phase composition over time: ■, weight fraction of ethanol in toluene-rich phase; □, weight fraction of ethanol in water-rich phase; lines are calculated by instationary DGT. Right: Concentration profile across the interface calculated by instationary DGT: dash-dotted line,  $t = 0$  min; dotted line,  $t = 5$  min; straight line,  $t = 450$  min.



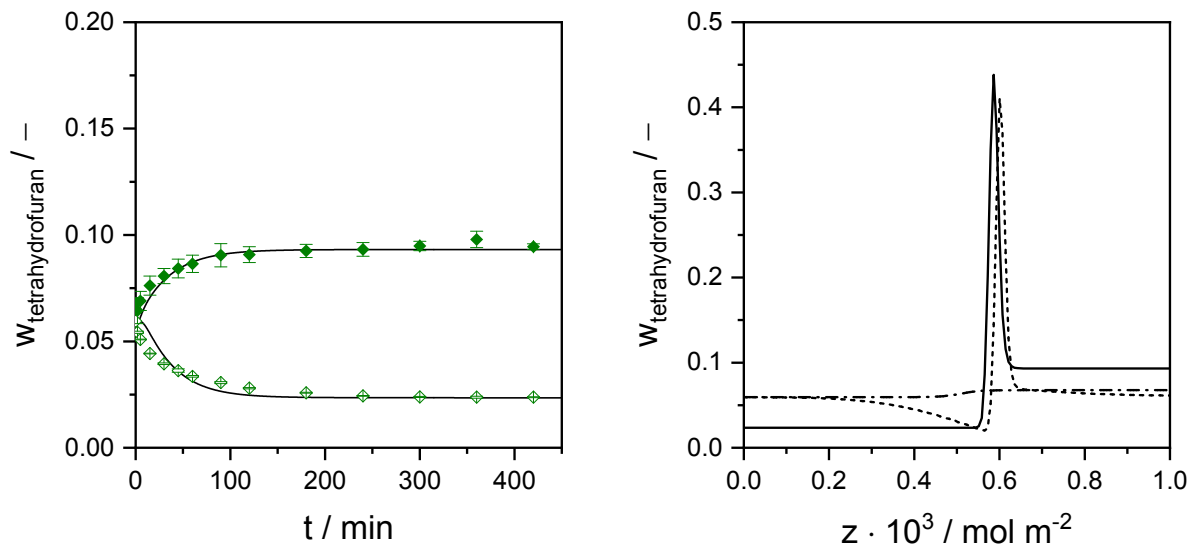

Figure S7. Interfacial mass transfer of tetrahydrofuran in the system water + toluene + tetrahydrofuran  $T = 298.15$  K. Tetrahydrofuran was injected into both phases at  $t = 0$  min. Left: Development of the bulk phase composition over time:  $\blacklozenge$ , weight fraction of tetrahydrofuran in toluene-rich phase;  $\blacklozenge$ , weight fraction of tetrahydrofuran in water-rich phase; lines are calculated by instationary DGT. Right: Concentration profile across the interface calculated by instationary DGT: dash-dotted line,  $t = 0$  min; dotted line,  $t = 5$  min; straight line,  $t = 450$  min.

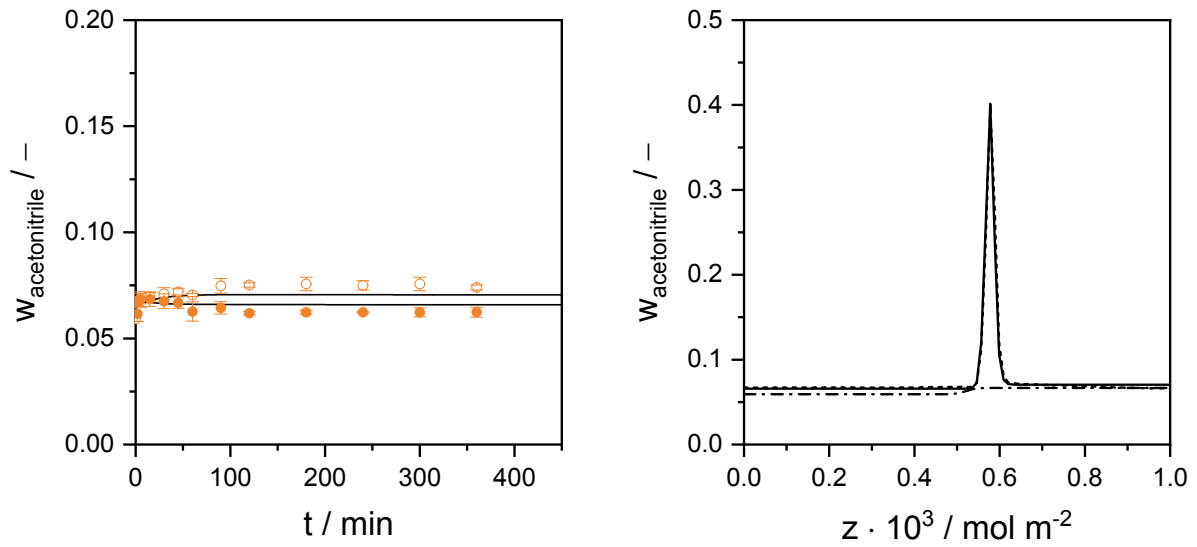

Figure S8. Interfacial mass transfer of acetonitrile in the system water + toluene + acetonitrile  $T = 298.15$  K. Acetonitrile was injected into both phases at  $t = 0$  min. Left: Development of the bulk phase composition over time: ●, weight fraction of acetonitrile in toluene-rich phase; ○, weight fraction of acetonitrile in water-rich phase; lines are calculated by instationary DGT. Right: Concentration profile across the interface calculated by instationary DGT: dash-dotted line,  $t = 0$  min; dotted line,  $t = 5$  min; straight line,  $t = 450$  min.
